# Supplementary material
Source: PubMed Central journal article supplement (PMC7212022)
Supplement: EMS86282-supplement-Supplementary_glioma_gene_mutations_.pdf [file EMS86282-supplement-Supplementary_glioma_gene_mutations_.pdf]

## Mutation data from resequencing protein kinase domain-encoding exons

# = Mutations confirmed in the recurrences from which the early glioma cultures were derived.

### Somatic mutations detected in the main screen

| Gene     | STS          | Sample  | Het/Hom | Nucleotide           | Amino acid | Non-syn/Syn |
|----------|--------------|---------|---------|----------------------|------------|-------------|
| AKT3     | stCE01-8884  | PD1487a | Het     | G511A                | G171R      | Non-syn     |
| BRD2 #   | stCE06-4208  | PD1487a | Het     | G89A                 | G30E       | Non-syn     |
| CDK2     | stCE12-1035  | PD1487a | Het     | C134T                | P45L       | Non-syn     |
| CDK3     | stCE17-1551  | PD1487a | Het     | G317A                | S106N      | Non-syn     |
| CDK4     | stCE12-1313  | PD1487a | Het     | C729T                | S243S      | Syn         |
| DAPK2    | stCE15-607   | PD1487a | Het     | C63T                 | D21D       | Syn         |
| DYRK2    | stCE12-1358  | PD1487a | Het     | C593T                | P198L      | Non-syn     |
| EPHA6    | stCE03-4862  | PD1487a | Het     | G2330A               | G777E      | Non-syn     |
| ERN1     | stCE00-215   | PD1487a | Het     | C2306T               | S769F      | Non-syn     |
| ERN1     | stCE00-215   | PD1487a | Het     | C2338T               | Q780*      | Non-syn     |
| GAK      | stCE04-3531  | PD1487a | Het     | C+5T Splice intron 3 |            |             |
| H11      | stCE12-1592  | PD1487a | Het     | G199A                | G67S       | Non-syn     |
| HRI      | stCE07-3961  | PD1487a | Het     | G909A                | K303K      | Syn         |
| INSRR    | stCE01-9151  | PD1487a | Het     | G3194A               | G1065E     | Non-syn     |
| LCK      | stCE01-9677  | PD1487a | Het     | G807A                | K269K      | Syn         |
| LTK      | stCE15-581   | PD1487a | Het     | C1453T               | L485L      | Syn         |
| MAP3K2   | stCE02-6180  | PD1487a | Het     | G1704A               | M568I      | Non-syn     |
| MAPK8    | stCE10-1778  | PD1487a | Het     | G529A                | G177R      | Non-syn     |
| MAPKAPK3 | stCE03-4927  | PD1487a | Het     | C82T                 | P28S       | Non-syn     |
| PCTK2    | stCE12-1096  | PD1487a | Het     | G930A                | L310L      | Syn         |
| PDK2     | stCE17-1089  | PD1487a | Het     | G1024A               | G342R      | Non-syn     |
| PDPK1    | stCE16-814   | PD1487a | Het     | C282T                | S94S       | Syn         |
| PINK1    | stCE01-10098 | PD1487a | Het     | C644T                | P215L      | Non-syn     |
| PRKCN    | stCE02-6802  | PD1487a | Het     | G2146A               | V716M      | Non-syn     |
| PRKG1    | stCE10-1900  | PD1487a | Het     | G1941A               | L647L      | Syn         |
| RAGE     | stCE14-633   | PD1487a | Het     | G531A                | G177G      | Syn         |
| RIPK3    | stCE14-711   | PD1487a | Het     | G111A                | R37R       | Syn         |

|          |              |         |     |                      |        |         |
|----------|--------------|---------|-----|----------------------|--------|---------|
| SgK495   | stCE01-10189 | PD1487a | Het | C811T                | Q271*  | Non-syn |
| STYK1    | stCE12-1401  | PD1487a | Het | G1183A               | V395I  | Non-syn |
| TAF1L    | stCE09-2103  | PD1487a | Het | G2625A               | G875G  | Syn     |
| TLK1     | stCE02-6321  | PD1487a | Het | C1906T               | L636F  | Non-syn |
| TRIB3    | stCE20-462   | PD1487a | Het | C288T                | C96C   | Syn     |
| TRIB3    | stCE20-462   | PD1487a | Het | C179T                | T60I   | Non-syn |
| TRIM33   | stCE01-9545  | PD1487a | Het | C2653T               | P885S  | Non-syn |
| BRD2     | stCE06-4208  | PD1489a | Het | G273A                | W91*   | Non-syn |
| BRD2     | stCE06-4212  | PD1489a | Het | C2141T               | P714L  | Non-syn |
| MLCK     | stCE16-690   | PD1489a | Hom | G1802A               | G601E  | Non-syn |
| CHUK     | stCE10-2016  | PD1489a | Hom | C397T                | R133*  | Non-syn |
| DMPK2    | stCE11-1541  | PD1489a | Het | C839T                | S280F  | Non-syn |
| DYRK1B   | stCE19-1104  | PD1489a | Het | C213T                | A71A   | Syn     |
| EPHB1    | stCE03-4331  | PD1489a | Het | G2092T               | E698*  | Non-syn |
| EPHB6    | stCE07-2675  | PD1489a | Het | G2578A               | E860K  | Non-syn |
| FRAP1    | stCE01-9091  | PD1489a | Het | C7427T               | P2476L | Non-syn |
| FYN      | stCE06-4237  | PD1489a | Het | G870A                | W290*  | Non-syn |
| GUCY2F   | stCE0X-3906  | PD1489a | Hom | G1703A               | G568D  | Non-syn |
| ICK      | stCE06-4328  | PD1489a | Het | G555A                | A185A  | Syn     |
| IRAK1    | stCE0X-5156  | PD1489a | Hom | G1234A               | V412M  | Non-syn |
| LMR3     | stCE19-839   | PD1489a | Het | C510T                | D170D  | Syn     |
| MGC8407  | stCE03-4706  | PD1489a | Het | G-1A Splice Intron 6 |        |         |
| NEK11    | stCE03-5370  | PD1489a | Het | C510T                | L170L  | Syn     |
| NLK      | stCE17-1206  | PD1489a | Het | G991A                | A331T  | Non-syn |
| NRBP2    | stCE08-1695  | PD1489a | Het | G943A                | V315M  | Non-syn |
| PDGFRA # | stCE04-3246  | PD1489a | Hom | G2485A               | G829R  | Non-syn |
| PRKCB1   | stCE16-481   | PD1489a | Hom | G1486A               | V496M  | Non-syn |
| PTK2     | stCE08-1323  | PD1489a | Het | C1835T               | A612V  | Non-syn |
| RPS6KA3  | stCE0X-4083  | PD1489a | Hom | C1822T               | L608F  | Non-syn |
| RPS6KB2  | stCE11-1756  | PD1489a | Het | G+6A Splice Intron 3 |        |         |
| SGK      | stCE06-4892  | PD1489a | Het | G456A                | K152K  | Syn     |
| SgK494   | stCE17-997   | PD1489a | Hom | G1075A               | D359N  | Non-syn |
| SNF1LK   | stCE21-340   | PD1489a | Het | G631A                | G211S  | Non-syn |
| SRPK2    | stCE07-2266  | PD1489a | Het | G728A                | G243D  | Non-syn |
| TAF1L    | stCE09-2097  | PD1489a | Het | C4645T               | H1549Y | Non-syn |
| TRIM33   | stCE01-9543  | PD1489a | Het | G1740A               | M580I  | Non-syn |

|       |            |         |     |        |       |         |
|-------|------------|---------|-----|--------|-------|---------|
| TYRO3 | stCE15-659 | PD1489a | Het | G2125A | A709T | Non-syn |
| FLT1  | stCE13-331 | PD1493a | Het | G2342A | R781Q | Non-syn |

**Somatic mutations detected in additional genes**

| Gene | STS         | Sample  | Het/Hom | Nucleotide | Amino acid | Non-syn/Syn |
|------|-------------|---------|---------|------------|------------|-------------|
| MSH6 | stCE02-7625 | PD1487a | Het     | C1453T     | Q485*      | Non-syn     |
| MSH6 | stCE02-7634 | PD1487a | Het     | G3907A     | A1303T     | Non-syn     |
| MSH6 | stCE02-7632 | PD1487a | Het     | C3495T     | C1165C     | Syn         |
| MSH6 | stCE02-7628 | PD1489a | Hom     | Del G2425  | V809*      | Non-syn     |
| PTEN | stCE10-2051 | D-542MG | Hom     | C1003T     | R335*      | Non-syn     |
| TP53 | stCE17-1401 | D-542MG | Hom     | G733A      | G245S      | Non-syn     |
| TP53 | stCE17-1401 | PD1489a | Hom     | A701G      | Y234C      | Non-syn     |
| TP53 | stCE17-1618 | PD1494a | Het     | C1009T     | R337C      | Non-syn     |
| TP53 | stCE17-1391 | PD1536a | Hom     | C817T      | R273C      | Non-syn     |
| TP53 | stCE17-1401 | PD1537a | Hom     | C742G      | R248G      | Non-syn     |
