# Supplementary material
Source: PubMed Central journal article supplement (PMC7212022)
Supplement: EMS86282-supplement-Supplementary_information.pdf [file EMS86282-supplement-Supplementary_information.pdf]

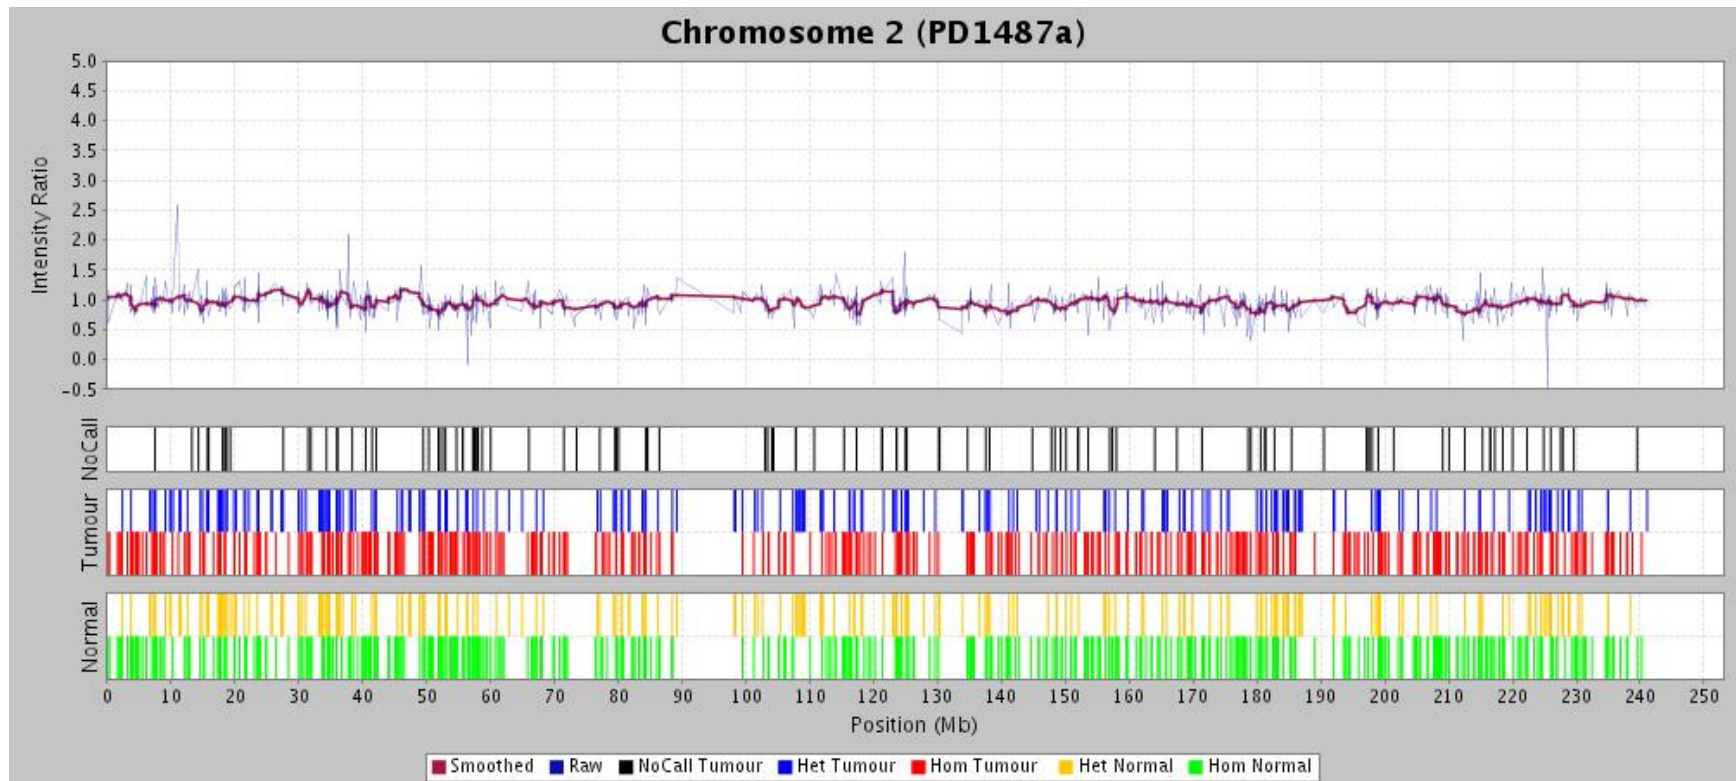

Copy number analysis of chromosome 2 for PD1487  
for additional data see <http://www.sanger.ac.uk/genetics/CGP/CopyNumberMapping/>

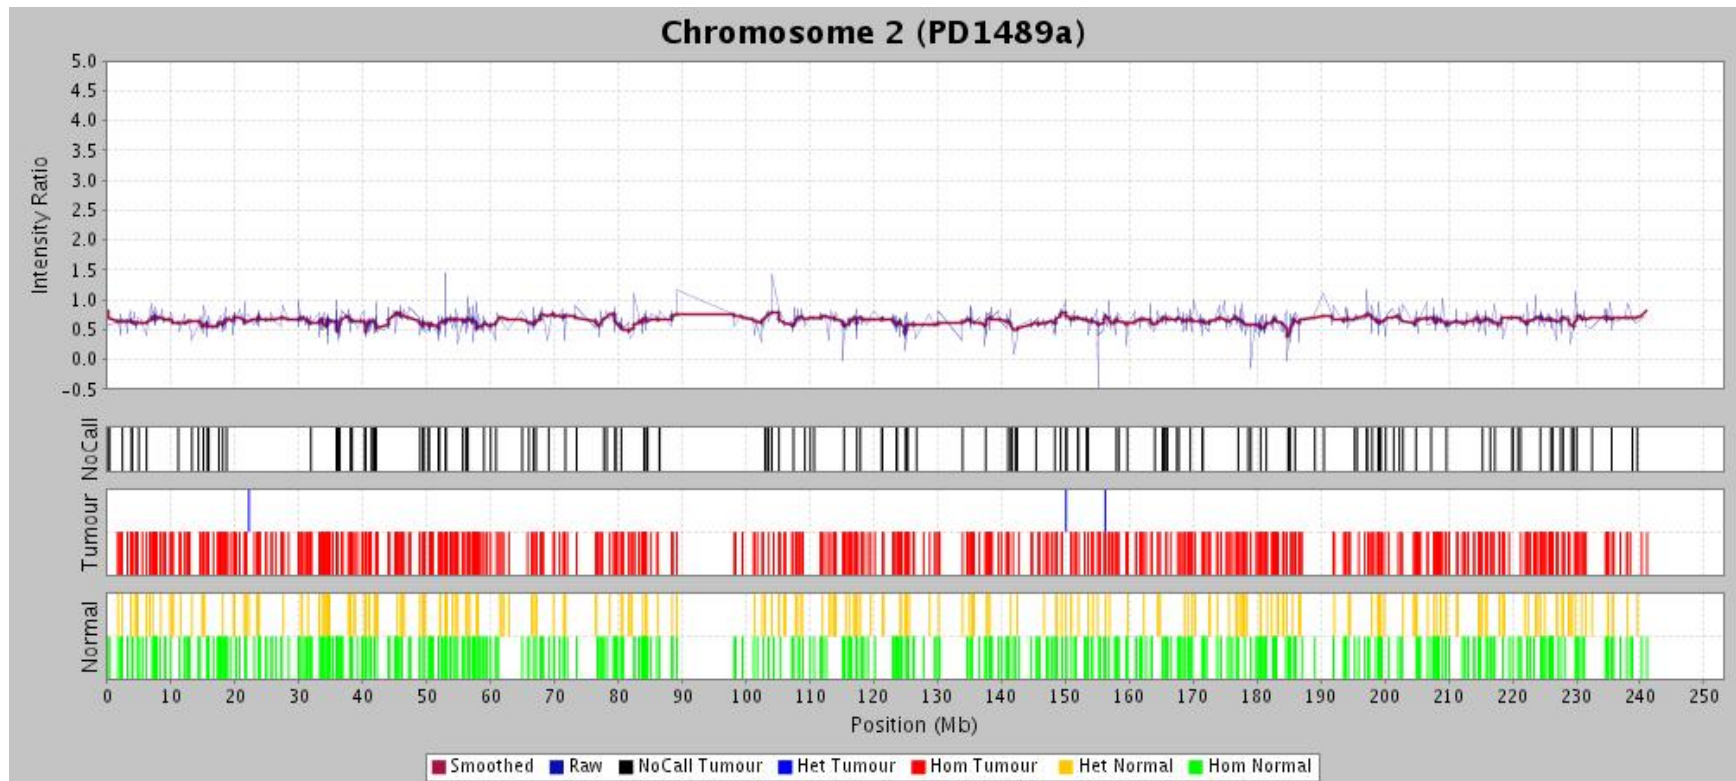

Copy number analysis of chromosome 2 for PD1489  
for additional data see <http://www.sanger.ac.uk/genetics/CGP/CopyNumberMapping/>

Conservation of A1303 in the MutS family across species\*

| Sequence Source           |      |                                       |      | Accession |
|---------------------------|------|---------------------------------------|------|-----------|
| PD1487 mutant             | 1291 | .....T.....                           | 1320 |           |
| Homo sapiens MSH6         | 1291 | KGACPKSYGFNAARLANLPEEVIQK <hr/> GHRKA | 1320 | 4504191   |
| Mus musculus              | 1289 | .....                                 | 1318 | 2506881   |
| Gallus gallus             | 139  | E.....DI...I.....                     | 168  | 50739005  |
| Danio rerio               | 1300 | R.....I..D...S..K..                   | 1329 | 33504503  |
| Xenopus laevis            | 1273 | .....HI.D.I..V..Q..                   | 1302 | 58399508  |
| Tetraodon nigroviridis    | 1193 | .....S.....C.QG..                     | 1221 | 47228957  |
| Schistosoma japonicum     | 100  | .....L..DK.TRL.LT..                   | 128  | 60602808  |
| Trypanosoma cruzi         | 862  | .P.GR...LYV.Q.....V.SAKC..            | 890  | 70876490  |
| Dictyostelium discoideum  | 1180 | .V..N...LHV.SM.G..R.I.T.AEE.S         | 1208 | 66827461  |
| Caenorhabditis elegans    | 1121 | .I.....Y..K..GIDHQ.VRNAY              | 1146 | 15375264  |
| Drosophila melanogaster   | 1116 | .....K..GM.QGI.KRAY                   | 1141 | 10727920  |
| Anopheles gambiae         | 917  | .....K..GM.TAI.KRAY                   | 942  | 58383922  |
| Plasmodium falciparum     | 1277 | ..V....F.IHI.K..G..K.I.DLA.E.S        | 1306 | 23613078  |
| Oryza sativa              | 1159 | .S.....V.V....GI.AS.L.RANE.S          | 1187 | 51091562  |
| Arabidopsis thaliana      | 1239 | .....V.V....G..DY.L.R                 | 1262 | 2104549   |
| Schizosaccharomyces pombe | 1177 | .I.....M.V.SM.G...K..DAAEE..          | 1205 | 3581916   |
| Escherichia coli          | 764  | ..AS....LAV.A..GV.K...KRARQ.          | 791  | 17017340  |
| Salmonella typhimurium    | 68   | ..AS....LAV.A..GV.K...KRARQ.          | 95   | 24285901  |
| Bacillus subtilis         | 752  | E..AD....IHV.Q..E..GDL.AR             | 776  | 7404403   |

\*Position of the A1303T mutation in PD1487 is indicated. Dots indicate identity and shading highlights the cognate position and conservation of A1303 across MutS family members from various species. Amino acid positions are given either side of the sequence and the GI accession number used in the alignment is given.



### **Additional Statistical Methods –**

To assess whether the sequence context of somatic mutations differed from that expected by chance the following procedure was adopted. The expected sequence context was derived from the entire set of trinucleotides centred around all cytosines in the coding sequences of the protein kinases. 10,000 Monte-Carlo simulations of the Chi-squared statistic were used to provide an exact statistical test to compare the observed against the expected.
